# Supplementary material
Source: HighWire-hosted journal article supplement (doi:10.1101/rna.078121.120)
Supplement: Supplemental_Table_2.xlsx [file Supplemental_Table_2.xlsx]

## Sheet: Feuil1
Category	Name	Sequence 5'-3'	Length (bp)	Estimated Tm (°C)	Concentration (pmol/uL)	Remarks
T7	AT_T7-EMCV IRES	CAACAAATATTAATACGACTCACTATAGGtaacgttactggccgaagccgcttg	54	66.3	100
T7	AT_T7-betaGlo	caacaaATATTAATACGACTCACTATAGGACATTTGCTTCTGACACAACTGTGTTCACTAGC	62	65.6	100
CoV	FM_T7-5'UTR-Scov	CAACAAATATTAATACGACTCACTATAGattaaaggtttataccttcccagg	52	61.6	100
CoV	AT_T7 - SL1(40) - betaGlo	caacaaATATTAATACGACTCACTATAGGattaaaggtttataccttcccaggtaacaaaccaaccaacACATTTGCTTCTGACACAAC	89	68.3	100
CoV	AT_T7 - mut1 SL1(40) - betaGlo	caacaaATATTAATACGACTCACTATAGGattaaaggtttattggatcccaggtaacaaaccaaccaacACATTTGCTTCTGACACAAC	89	68.4	100
CoV	AT_T7_SL1-2-3_bGlo	caacaacaaATATTAATACGACTCACTATAGGattaaaggtttataccttcccaggtaacaaaccaaccaactttcgatc tcttgtagatctgttctctaaacgaacACATTTGCTTCTGACACAACTG	129	70.1	100
CoV	AT_T7 - SL1mut1(40) - CoV	caacaaATATTAATACGACTCACTATAGGattaaaggtttattggatcccaggtaacaaaccaaccaacTTTCGATCTCT TGTAGATCTGTTCTC	95	68.2	100
rev IRES	AT_Rev EMCV IRES	gtgcgcgcaagtctcttgttcCATagttgtggcCATattatCATcgtgtttttcaaagg	59	68.5	100	.+12 N-t codons
rev IRES	AT_Rev HCV IRES	TTTTTCTTTGAGGTTTAGGATTCGTGCTC	29	57.6	100	.+12 N-t codons
rev IRES	AT_Rev CoV IRES	tgttttctcgttgaaaccagggacaaggctctccatcttacctttcggtcacacccggac	60	71.3	100	.+12 N-t codons
rev IRES	AT_Rev CoV IRES CAA	GTGTTGTTGTTGTTGTTGTTGTTGTTGTTGtgttttctcgttgaaaccagggacaaggctctccatcttacctttcggtcacacccggac	90	71.6	100	.+12 N-t codons
rev IRES	AT_Rev EMCV IRES CAA	GTGTTGTTGTTGTTGTTGTTGTTGTTGTTGgtgcgcgcaagtctcttgttcCATagttgtggcCATattatCATcgtgtttttcaaagg	89	70.7	100	.+12 N-t codons
rev IRES	AT_Rev HCV IRES CAA	GTGTTGTTGTTGTTGTTGTTGTTGTTGTTGtttggtttttctttgaggtttaggattcgtgctcatggtgcacgg	75	70	100	.+12 N-t codons
rev Reporter	AT_pUC19(XbaI)-SpeI-Renilla-rev	gcatgcctgcaggtcgactACTAGTttattgttcatttttgagaac	46	64.8	100	HiFi cloning in pUC19 digested by XbaI
rev CAA	AT_rev ATG Renilla36 CAA	GTGTTGTTGTTGTTGTTGTTGTTGTTGTTGTTTCCTTTGTTCTGGATCATAAACTTTCGAAGTCAT	66	67.2	100
